# Supplementary material for: Dendritic Ir(iii) complexes functionalized with triphenylsilylphenyl groups: Synthesis, DFT calculation and comprehensive structure-property correlation
Source: Royal Society of Chemistry journal article supplement (doi:10.1039/b913122a), 2009-01-01
Supplement: b913122a.pdf [file b913122a.pdf]

**SUPPORTING INFORMATION FOR**

**“Dendritic Ir(III) Complexes Functionalized with Triphenylsilylphenyl Groups: Synthesis, DFT  
Calculation and Comprehensive Structure-Property Correlation”**

*Jae Jin Kim,<sup>a</sup> Youngmin You,<sup>a</sup> Young-Seo Park,<sup>b</sup> Jang-Joo Kim<sup>b</sup> and Soo Young Park\*<sup>a</sup>*

<sup>a</sup> Center for Supramolecular Optoelectronic Materials and Department of Materials Science & Engineering,  
College of Engineering, Seoul National University, San 56-1, Shillim-Dong, Kwanak-Gu, Seoul 151-744,  
Korea

<sup>b</sup> OLED center, Seoul National University, San 56-1, Shillim-Dong, Kwanak-Gu, Seoul 151-744, Korea

**Characterization Data of cyclometalating ligand for Ir(ppyTPS)<sub>3</sub>, 2-Phenyl-4-(4-(triphenylsilyl)phenyl)pyridine (1').**

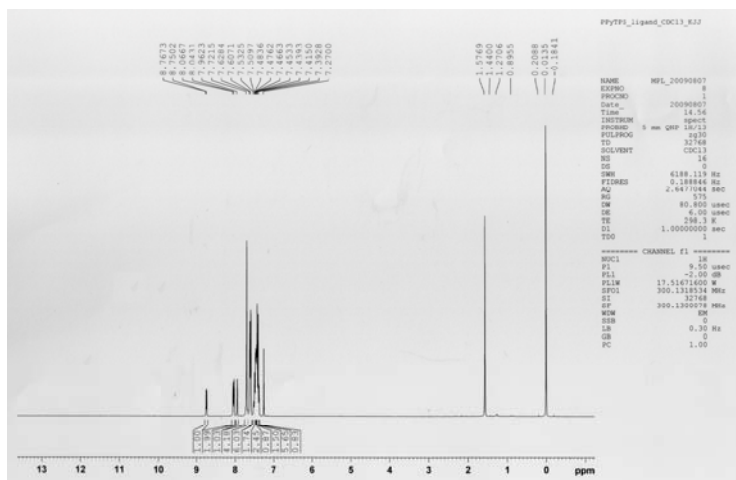

**Figure S1** <sup>1</sup>H NMR (CDCl<sub>3</sub>, 300 MHz) of cyclometalating ligand for Ir(ppyTPS)<sub>3</sub>

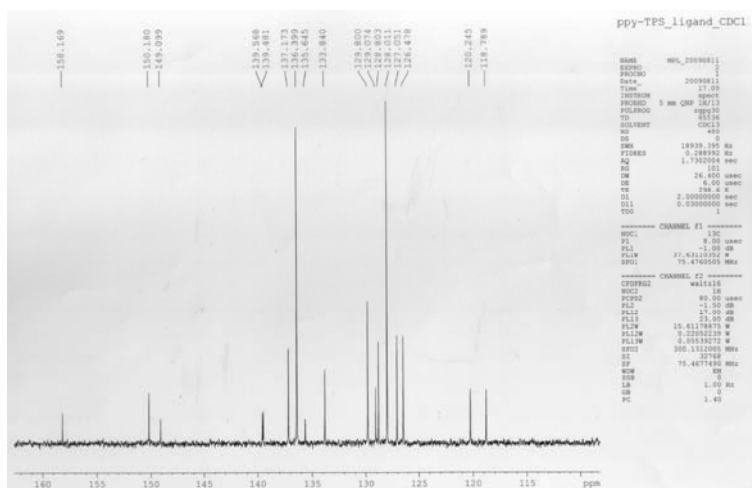

**Figure S2** <sup>13</sup>C NMR (CDCl<sub>3</sub>, 75 MHz) of cyclometalating ligand for Ir(ppyTPS)<sub>3</sub>

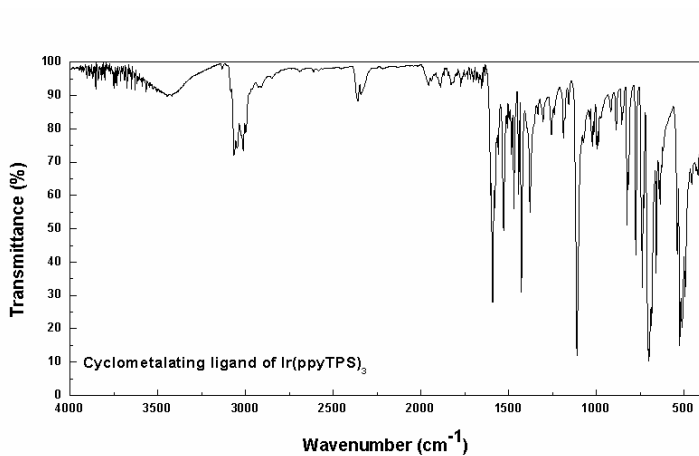

**Figure S3** FT-IR spectrum of cyclometalating ligand for Ir(ppyTPS)<sub>3</sub> in KBr disk

**Characterization Data of Ir(ppyTPS)<sub>3</sub>, Ir(III) Tris(2-phenyl-4-(4-(triphenylsilyl)phenyl)pyridinato-N,C<sup>3'</sup>) (1).**

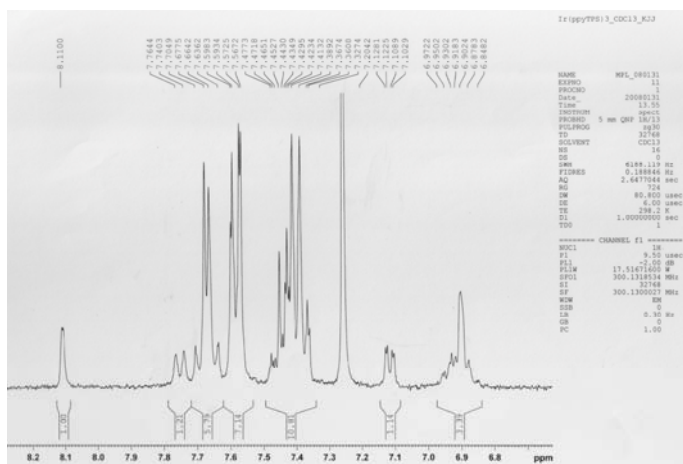

**Figure S4** <sup>1</sup>H NMR (CDCl<sub>3</sub>, 300 MHz) of Ir(ppyTPS)<sub>3</sub>

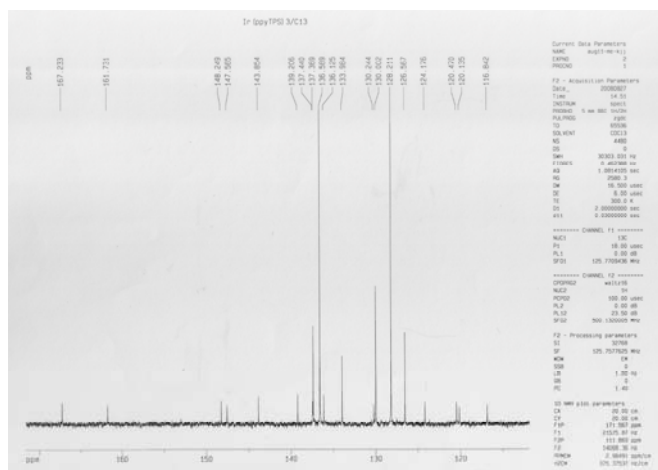

**Figure S5** <sup>13</sup>C NMR (CDCl<sub>3</sub>, 125 MHz) of Ir(ppyTPS)<sub>3</sub>

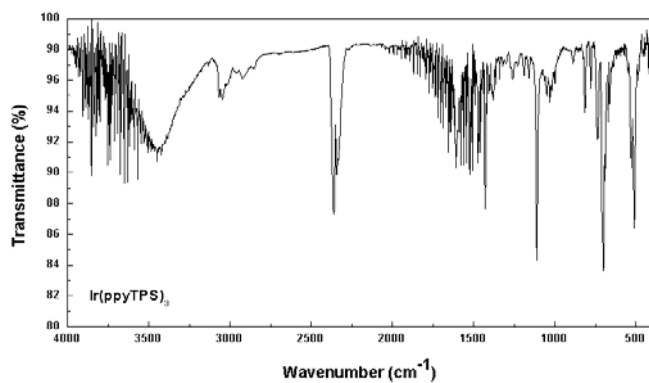

**Figure S6** FT-IR spectrum of Ir(ppyTPS)<sub>3</sub> in KBr disk

**Characterization Data of cyclometalating ligand for Ir(TPSppyTPS)<sub>3</sub>, 2-(4'-(Triphenylsilyl)biphenyl-3-yl)-4-(4-(triphenylsilyl)phenyl)pyridine (2').**

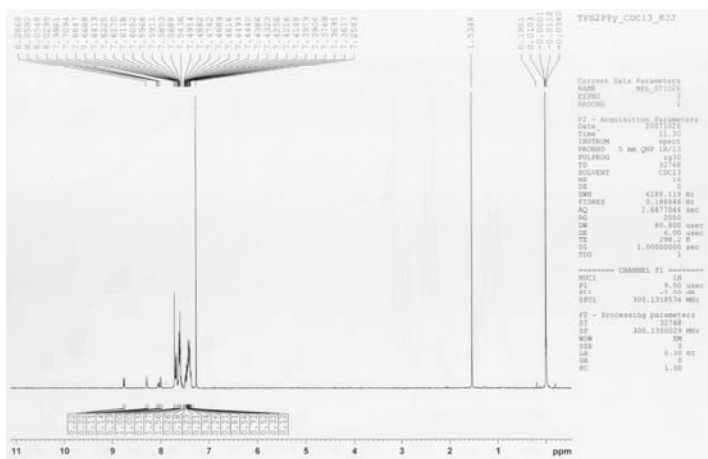

**Figure S7** <sup>1</sup>H NMR (CDCl<sub>3</sub>, 300 MHz) of cyclometalating ligand for Ir(TPSppyTPS)<sub>3</sub>

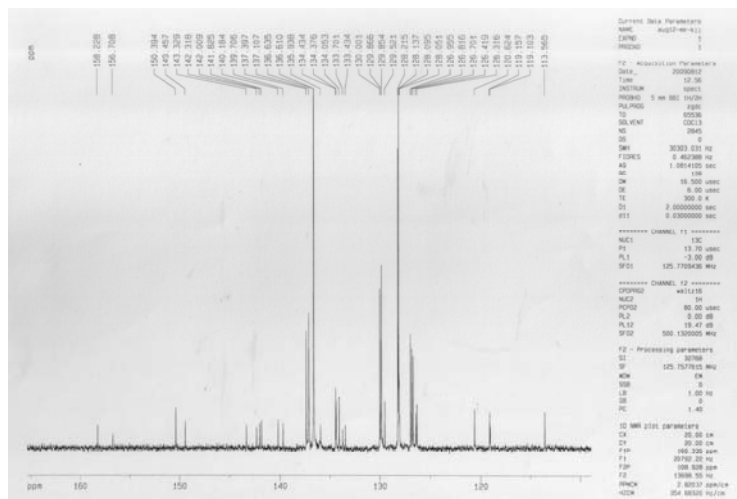

**Figure S8** <sup>13</sup>C NMR (CDCl<sub>3</sub>, 125 MHz) of cyclometalating ligand for Ir(TPSppyTPS)<sub>3</sub>

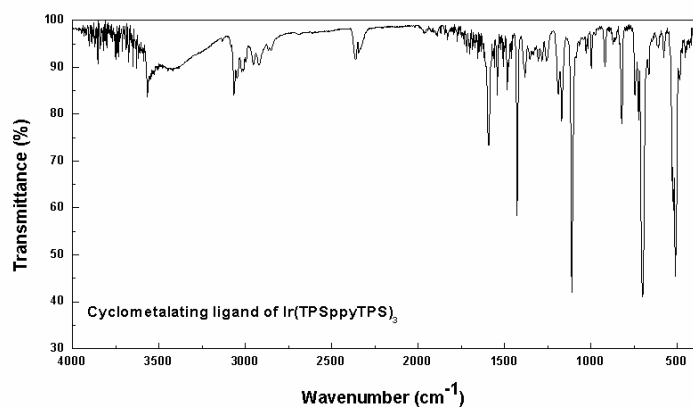

**Figure S9** FT-IR spectrum of cyclometalating ligand for Ir(TPSppyTPS)<sub>3</sub> in KBr disk

**Characterization Data of Ir(TPSPpyTPS)<sub>3</sub>, Ir(III) tris(2-(4'-(triphenylsilyl)biphenyl-3-yl)-4-(triphenylsilyl)phenyl)pyridinato-*N,C*<sup>3'</sup>) (2).**

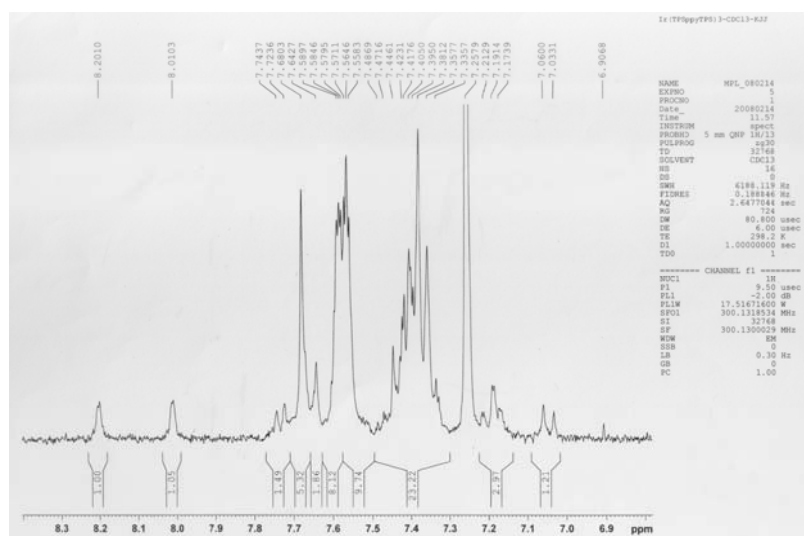

**Figure S10** <sup>1</sup>H NMR (CDCl<sub>3</sub>, 300 MHz) of Ir(TPSPpyTPS)<sub>3</sub>

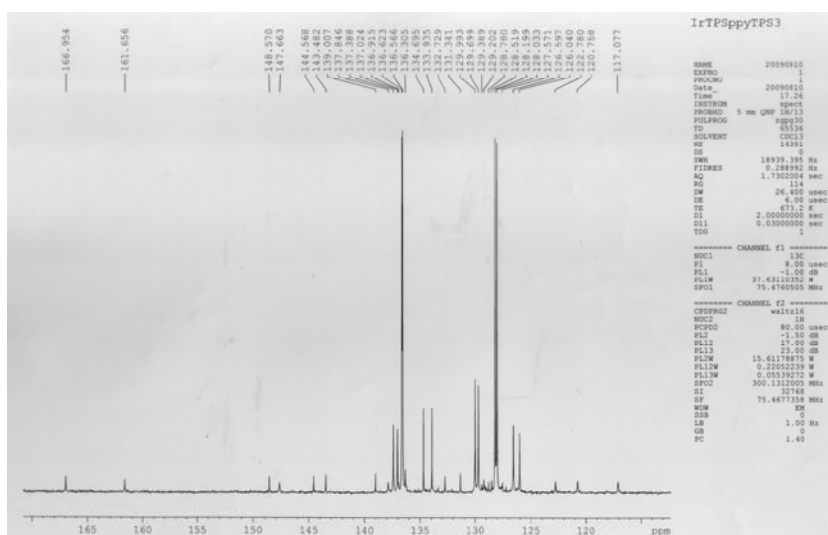

**Figure S11** <sup>13</sup>C NMR (CDCl<sub>3</sub>, 75 MHz) of Ir(TPSPpyTPS)<sub>3</sub>

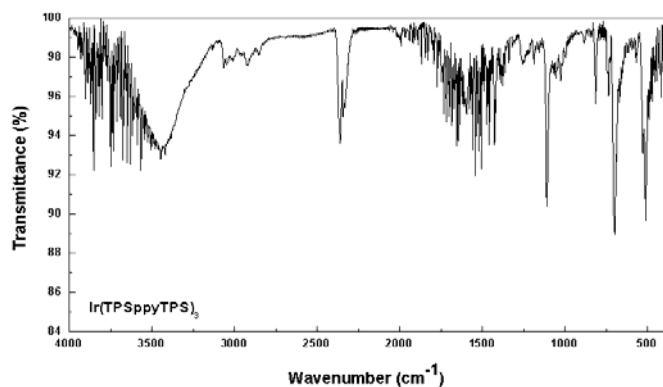

**Figure S12** FT-IR spectrum of Ir(TPSPpyTPS)<sub>3</sub> in KBr disk

**Characterization Data of Ir(TPSPpy)<sub>3</sub>, Ir(III) tris(2-(4'-(triphenylsilyl)biphenyl-3-yl)pyridinato-N,C<sup>3'</sup>) (4).**

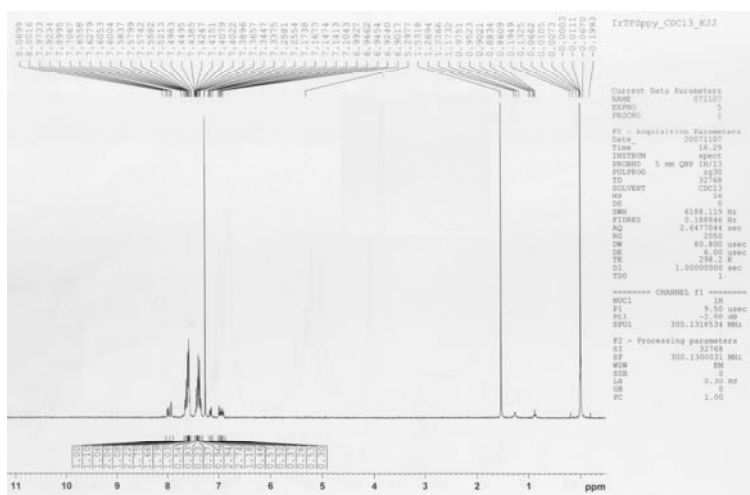

**Figure S13** <sup>1</sup>H NMR (CDCl<sub>3</sub>, 300 MHz) of Ir(TPSPpy)<sub>3</sub>

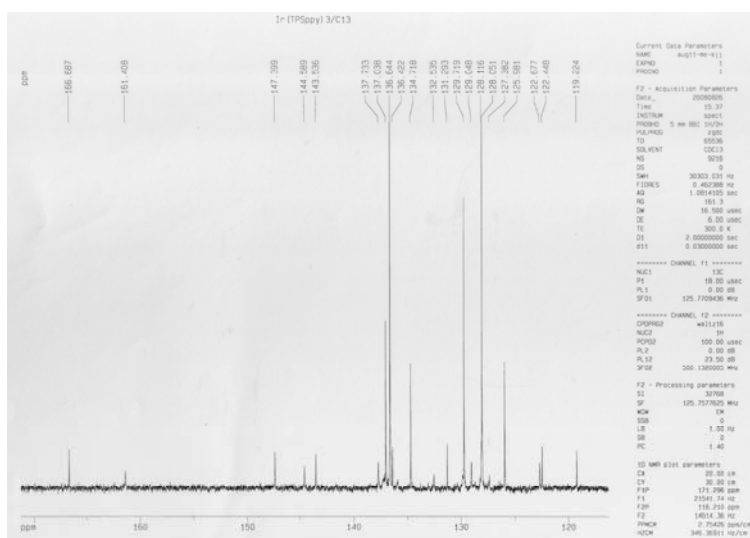

**Figure S14** <sup>13</sup>C NMR (CDCl<sub>3</sub>, 125 MHz) of Ir(TPSPpy)<sub>3</sub>

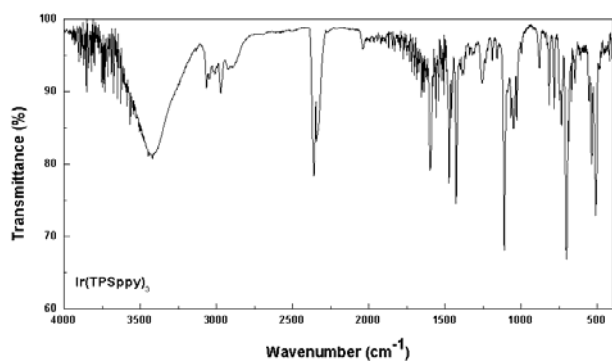

**Figure S15** FT-IR spectrum of Ir(TPSPpy)<sub>3</sub> in KBr disk

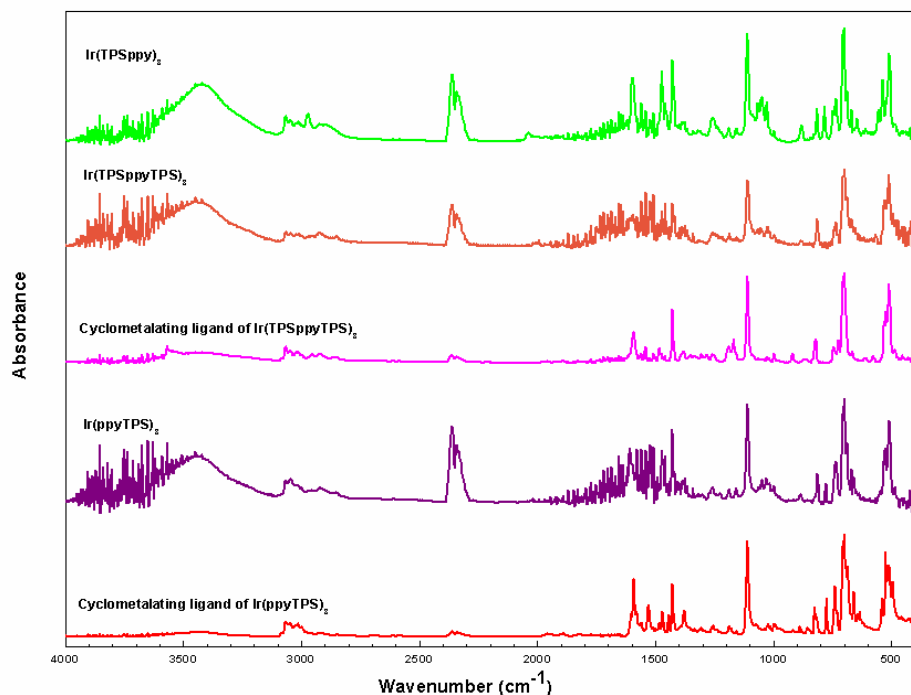

**Figure S16** FT-IR spectra of newly synthesized Ir(III) complexes, corresponding ligands and reference in KBr disk

Phenyl-silicon compounds have a strong, characteristic band at about  $1100\text{ cm}^{-1}$  which often splits into two when two phenyl groups are attached to the one silicon atom, but appears as a single band in the case of three phenyl groups.<sup>1</sup>

### Solvatochromic Behavior

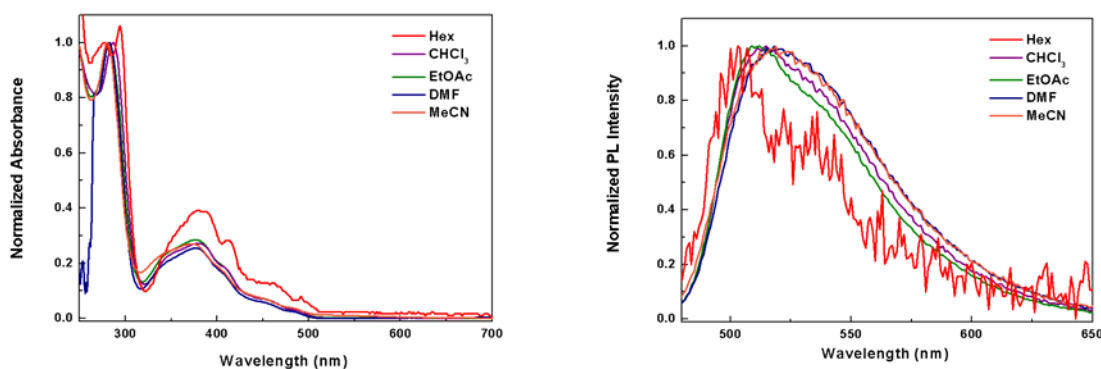

**Figure S17** Normalized UV-vis absorption and photoluminescence spectra of Ir(ppy)<sub>3</sub> in the solution state ( $1.0 \times 10^{-5}$  M in solvents which show different polarity, excitation wavelength = 340 nm)

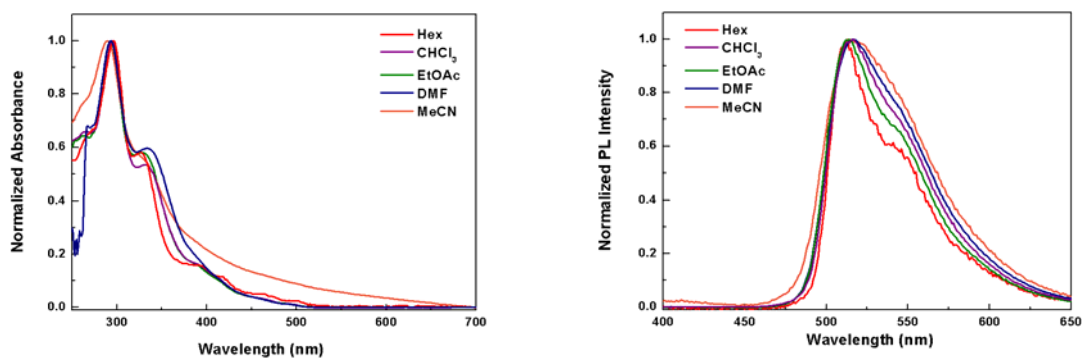

**Figure S18** Normalized UV-vis absorption and photoluminescence spectra of Ir(TPSppy)<sub>3</sub> in the solution state ( $1.0 \times 10^{-5}$  M in solvents which show different polarity, excitation wavelength = 340 nm)

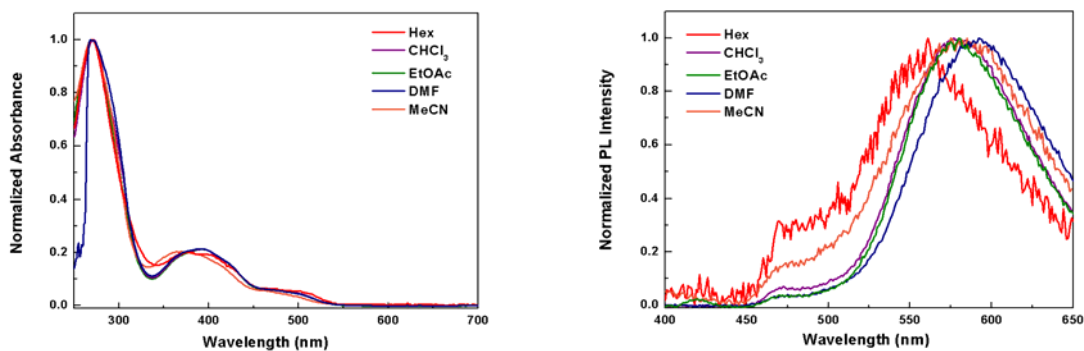

**Figure S19** Normalized UV-vis absorption and photoluminescence spectra of Ir(ppyTPS)<sub>3</sub> in the solution state ( $1.0 \times 10^{-5}$  M in solvents which show different polarity, excitation wavelength = 340 nm)

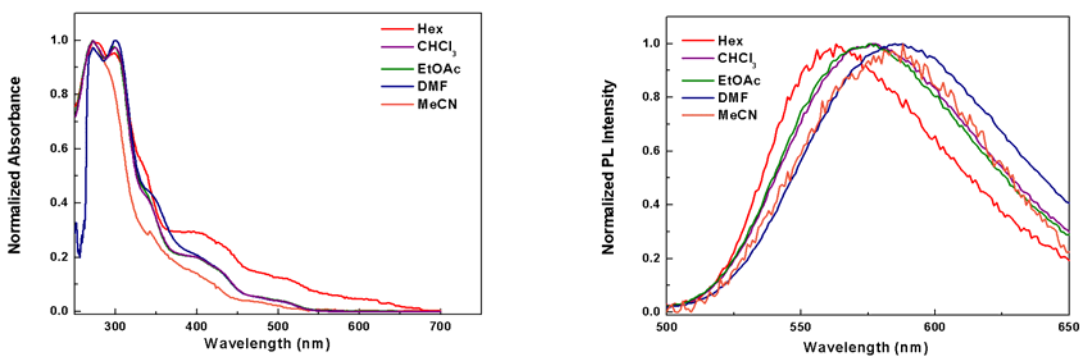

**Figure S20** Normalized UV-vis absorption and photoluminescence spectra of Ir(TPSpyTPS)<sub>3</sub> in the solution state ( $1.0 \times 10^{-5}$  M in solvents which show different polarity, excitation wavelength = 340 nm)



### Enhanced Thermal Property

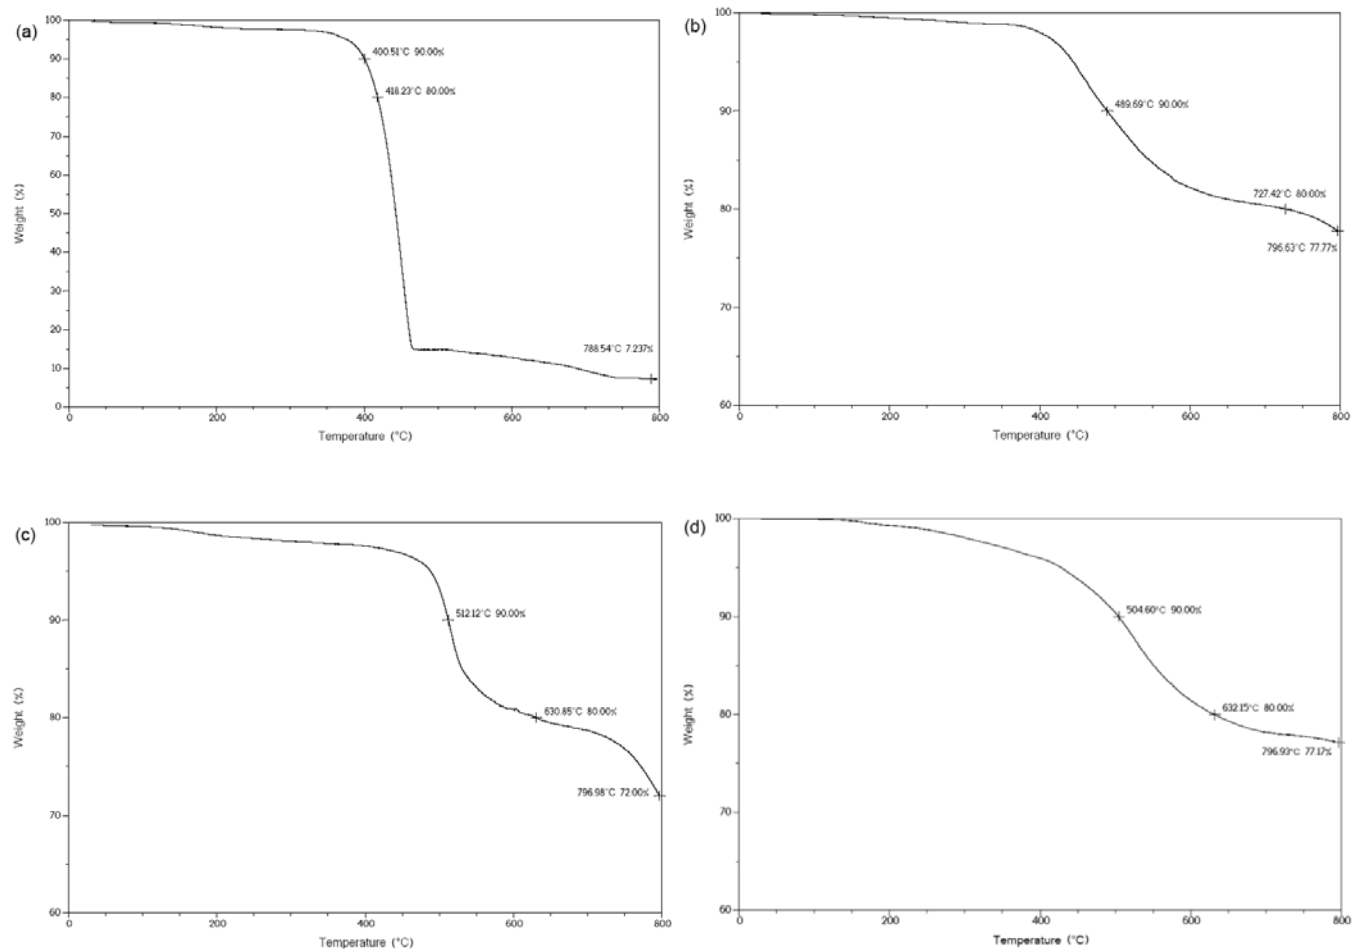

**Figure S21** Thermal gravimetric analysis of Ir(III) complexes (a) Ir(ppy)<sub>3</sub>, (b) Ir(TPSppy)<sub>3</sub>, (c) Ir(ppyTPS)<sub>3</sub>, and (d) Ir(TPSppyTPS)<sub>3</sub>

### Reference

1. George Socrates, *Infrared Characteristic Group Frequencies*, John Wiley & Sons, Chichester, 2nd edn., 1994, ch. 18, pp. 188-194.
